# Supplementary material
Source: publisher figshare collection journal article supplement (https://gsapubs.figshare.com/ndownloader/files/22276926)
Supplement: Supplementary file 1 [file 22276926]

## Sheet: calculated results
Sample Number	1	1	2	2	3	3	4	4	5	5	6	6	7	7	7
Location	Sailipu	Sailipu	Sailipu	Sailipu	Sailipu	Sailipu	Sailipu	Sailipu	Sailipu	Sailipu	Sailipu	Sailipu	Sailipu	Sailipu	Sailipu
Rock Type	Lherzolite Xenolith	Lherzolite Xenolith	Lherzolite Xenolith	Lherzolite Xenolith	Lherzolite Xenolith	Lherzolite Xenolith	Lherzolite Xenolith	Lherzolite Xenolith	Lherzolite Xenolith	Lherzolite Xenolith	Lherzolite Xenolith	Lherzolite Xenolith	Lherzolite Xenolith	Lherzolite Xenolith	Lherzolite Xenolith
Spinel EMPA data	P15-2-1-1-SPL1	P15-2-1-1-SPL2	P15-2-1-1-SPL3	P15-2-1-1-SPL4	P15-2-1-1-SPL5	P15-2-1-1-SPL6	P15-2-1-1-SPL7	P15-2-1-1-SPL8	P15-2-1-1-SPL10	P15-2-1-1-SPL11	P15-2-1-1-SPL14	P15-2-1-1-SPL15	P15-2-1-1-SPL16	P15-2-1-1-SPL17	P15-2-1-1-SPL19
SiO2	0.305	0.05	0.092	0.124	0.039	0.052	0.087	0.069	0.063	0.066	0.079	0.126	0.118	0.025	0.198
TiO2	3.909	2.494	3.525	3.258	2.838	2.118	2.007	3.417	3.55	3.102	2.061	3.564	1.667	2.155	1.422
Al2O3	10.721	8.571	10.261	9.648	9.691	9.056	8.969	10.342	10.041	8.699	8.558	9.436	11.759	11.959	11.983
Cr2O3	42.903	48.306	44.601	44.554	47.145	50.716	49.547	45.631	44.163	44.332	48.126	42.458	45.553	46.989	48.155
FeOt	31.178	30.234	30.832	30.964	28.731	26.293	27.081	29.996	31.013	33.899	29.761	34.268	25.429	26.946	26.291
MnO	0.234	0.189	0.193	0.246	0.145	0.236	0.228	0.167	0.254	0.227	0.219	0.203	0.147	0.235	0.188
MgO	9.333	8.554	8.707	8.882	9.627	10.015	9.557	9.259	9.4	7.274	8.387	7.762	10.047	10.14	9.4
NiO	0.053	0.084	0.072	0.026	0.089	0.023	0.022	0.077	0.047	0.092	0.071	0.101	0.105	0.116	0.151
Total	99.932	100.052	99.615	99.382	100.086	100.083	99.335	100.459	99.812	99.495	99.148	99.713	96.498	99.879	99.16
Olivine EMPA data	P15-2-1-1-OL1	P15-2-1-1-OL2	P15-2-1-1-OL3	P15-2-1-1-OL4	P15-2-1-1-OL5	P15-2-1-1-OL6	P15-2-1-1-OL7	P15-2-1-1-OL8	P15-2-1-1-OL10	P15-2-1-1-OL11	P15-2-1-1-OL14	P15-2-1-1-OL15	P15-2-1-1-OL16	P15-2-1-1-OL17	P15-2-1-1-OL19
SiO2	39.265	39.693	39.652	39.684	39.908	40.058	40.419	40.299	39.701	39.597	40.486	39.82	40.408	40.438	41.517
TiO2	-	-	0.09	-	0.079	0.011	0.022	-	-	-	-	-	0.011	0.089	-
Al2O3	0.037	-	-	0.022	0.003	0.027	0.009	-	0.021	0.017	-	0.001	0.187	0.565	0.222
FeOt	14.582	13.971	14.499	14.986	12.577	13.594	13.268	13.047	15.135	15.16	15.296	14.837	12.809	11.441	12.236
MnO	0.074	0.122	0.139	0.155	0.081	0.145	0.094	0.124	0.091	0.064	0.131	0.265	0.101	0.114	0.211
MgO	44.808	44.767	44.8	44.781	46.08	46.253	46.068	45.623	43.811	44.415	44.365	43.742	44.769	44.447	44.805
NiO	0.135	0.164	0.118	0.165	0.17	0.177	0.147	0.17	0.171	0.195	0.164	0.055	0.195	0.202	0.211
CaO	0.039	0.049	0.063	0.079	0.079	0.099	0.056	0.062	0.093	0.085	0.061	0.166	0.128	0.132	0.204
Cr2O3	0.097	0.087	0.068	0.046	0.054	0.052	0.035	0.074	0.086	0.131	0.039	0.057	0.168	1.644	0.157
Total	99.11	98.998	99.443	99.981	99.084	100.5	100.16	99.421	99.252	99.766	100.587	98.989	99.014	99.169	99.627
Orthopyroxene EMPA data-Used for comparison by the oxybarometer of Wood (1990)	OPX-01	OPX-01	OPX-02	OPX-02	OPX-03	OPX-03	OPX-04	OPX-04	OPX-05	OPX-05	OPX-06	OPX-07	OPX-07	OPX-08	OPX-08
SiO2	59.045	59.045	58.239	58.239	58.295	58.295	57.728	57.728	59.056	59.056	58.228	57.007	57.007	59.583	59.583
TiO2	0.183	0.183	0.142	0.142	0.122	0.122	0.233	0.233	0.051	0.051	0.081	0.163	0.163	0.214	0.214
Al2O3	1.351	1.351	1.512	1.512	1.788	1.788	2.476	2.476	1.412	1.412	1.547	4.217	4.217	1.459	1.459
FeOt	7.228	7.228	6.77	6.77	6.303	6.303	7.07	7.07	6.415	6.415	8.003	5.896	5.896	5.577	5.577
MnO	0.092	0.092	0.068	0.068	0.078	0.078	0.11	0.11	0.085	0.085	0.16	0.025	0.025	0.189	0.189
MgO	31.209	31.209	31.23	31.23	31.169	31.169	30.404	30.404	31.79	31.79	30.16	30.844	30.844	32.611	32.611
CaO	1.195	1.195	0.59	0.59	1.387	1.387	1.345	1.345	0.545	0.545	1.483	2.073	2.073	0.502	0.502
Na2O	0.037	0.037	0.033	0.033	0.042	0.042	0.078	0.078	0.018	0.018	0.059	0.068	0.068	0.032	0.032
Cr2O3	0.339	0.339	0.429	0.429	0.501	0.501	0.586	0.586	0.392	0.392	0.385	0.214	0.214	0.424	0.424
Total	100.679	100.679	99.013	99.013	99.685	99.685	100.03	100.03	99.764	99.764	100.106	100.507	100.507	100.591	100.591
Cations of Spinel based on 3 cations per formula (Fe3+ and Fe2+ are adjusted to balance the charge deficiency or excess to 4 oxygens per 3 cations)
Si+4	0.0101633	0.00169522	0.00309812	0.00420163	0.00130809	0.00174197	0.00295092	0.00230006	0.00210734	0.00227163	0.00271166	0.00429646	0.0040365	0.000825668	0.00661878
Ti+4	0.0979783	0.0636035	0.0892892	0.083038	0.0716001	0.0533696	0.0512054	0.0856771	0.0893206	0.0803093	0.0532127	0.0914129	0.0428932	0.0535356	0.0357554
Al+3	0.421044	0.342486	0.407246	0.385293	0.383087	0.357546	0.358542	0.406304	0.395847	0.352875	0.346208	0.379215	0.474079	0.465498	0.472101
Cr+3	1.13031	1.29489	1.18749	1.1936	1.25021	1.34326	1.32871	1.20261	1.16796	1.20639	1.30606	1.14466	1.23201	1.22698	1.27271
Fe+3	0.232362	0.232031	0.220488	0.246628	0.220887	0.188975	0.204432	0.215129	0.253337	0.275575	0.235884	0.28471	0.200048	0.198801	0.170441
Fe+2	0.636477	0.625217	0.647809	0.630796	0.585008	0.54763	0.563741	0.621069	0.614211	0.700173	0.618417	0.692493	0.527411	0.545444	0.564539
Mn+2	0.00660444	0.00542753	0.00550495	0.0070602	0.00411932	0.00669631	0.00655027	0.00471511	0.00719636	0.00661768	0.00636704	0.00586302	0.00425918	0.00657384	0.00532299
Mg+2	0.46364	0.432363	0.437123	0.448675	0.481379	0.500166	0.483265	0.460128	0.468756	0.373244	0.42918	0.394583	0.512371	0.499262	0.468452
Ni+2	0.00142053	0.00229073	0.00195022	0.000708615	0.00240106	0.000619736	0.000600208	0.00206453	0.00126454	0.00254696	0.00196023	0.00277014	0.00288904	0.00308151	0.00406004
Mg#=Mg/(Mg+Fe)	0.421446	0.408823	0.402904	0.415644	0.451411	0.477351	0.461568	0.425573	0.432844	0.347716	0.40968	0.362977	0.492768	0.477897	0.453491
Cr#=Cr/(Cr+Al)	0.728596	0.790832	0.744631	0.755973	0.765452	0.789778	0.7875	0.747467	0.746869	0.773691	0.790465	0.75115	0.722126	0.724961	0.729426
Fe3+/∑Fe Calculated on the basis of stoichiometry	0.26744	0.270669	0.253931	0.281082	0.274089	0.256549	0.266128	0.257271	0.292015	0.282424	0.276113	0.291352	0.274996	0.267117	0.231899
uncertainty of Fe3+/∑Fe Calculated on the basis of stoichiometry	0.00253716	0.00260217	0.0213716	0.0211678	0.0325834	0.0350661	0.019356	0.0173447	0.0314915	0.0273879	0.0492157	0.0438134	0.0232372	0.0227011	0.0229372
Cations of Olivine based on 4 oxygen atoms per formula
Si+4	0.994562	1.00361	0.999331	0.997693	1.00077	0.995622	1.00444	1.00798	1.00619	0.998825	1.01052	1.00954	1.0153	1.00976	1.03014
Ti+4	0	0	0.00170615	0	0.00149015	0.000205649	0.000411236	0	0	0	0	0	0.000207897	0.00167165	0
Al+3	0.00110455	0	0	0.00065187	8.86651e-05	0.000790908	0.000263596	0	0.000627271	0.000505397	0	2.98798e-05	0.00553765	0.0166277	0.00649205
Fe+2	0.308887	0.295418	0.305589	0.315082	0.263759	0.282559	0.27574	0.272912	0.320788	0.319803	0.319281	0.314574	0.269152	0.238917	0.253903
Mn+2	0.00158761	0.00261275	0.00296718	0.00330064	0.00172046	0.00305252	0.00197857	0.00262702	0.00195347	0.00136739	0.00276946	0.00569052	0.00214948	0.00241111	0.00443445
Mg+2	1.69202	1.68747	1.68324	1.67842	1.72271	1.71384	1.70672	1.70123	1.65534	1.67025	1.65084	1.65327	1.67698	1.6546	1.65738
Ni+2	0.00275043	0.00333532	0.00239203	0.00333661	0.00342897	0.0035385	0.0029383	0.00342015	0.00348591	0.00395642	0.00329248	0.00112156	0.00394096	0.00405712	0.00421109
Ca+2	0.0010584	0.00132742	0.00170115	0.00212797	0.00212256	0.00263632	0.00149102	0.00166152	0.00252534	0.00229723	0.00163127	0.00450907	0.00344583	0.00353149	0.00542325
Cr+3	0.00194255	0.00173919	0.00135497	0.000914355	0.00107064	0.00102184	0.000687673	0.0014634	0.00172327	0.0026126	0.000769625	0.00114254	0.00333743	0.0324567	0.00307997
Cations of Orthopyroxene based on 6 oxygen atoms per formula (Fe3+ and Fe2+ are adjusted to balance the charge deficiency or excess to 6 oxygens per 4 cations)
Si+4	2.07033	2.07033	2.07352	2.07352	2.06409	2.06409	2.05359	2.05359	2.08104	2.08104	2.065	2.01936	2.01936	2.0764	2.0764
Ti+4	0.00482655	0.00482655	0.00380288	0.00380288	0.00324928	0.00324928	0.00623465	0.00623465	0.00135181	0.00135181	0.00216074	0.00434313	0.00434313	0.0056096	0.0056096
Al+3	0.027915	0.027915	0.0317229	0.0317229	0.0373072	0.0373072	0.0519044	0.0519044	0.0293209	0.0293209	0.03233	0.088027	0.088027	0.029962	0.029962
Fe+3	-0.12111	-0.12111	-0.127513	-0.127513	-0.118375	-0.118375	-0.118066	-0.118066	-0.132629	-0.132629	-0.113348	-0.09073	-0.09073	-0.132494	-0.132494
Fe+2	0.333058	0.333058	0.329089	0.329089	0.305013	0.305013	0.328397	0.328397	0.321675	0.321675	0.350702	0.265392	0.265392	0.295028	0.295028
Mn+2	0.00273231	0.00273231	0.00205064	0.00205064	0.00233926	0.00233926	0.0033144	0.0033144	0.002537	0.002537	0.00480611	0.000750086	0.000750086	0.00557874	0.00557874
Mg+2	1.6314	1.6314	1.65764	1.65764	1.6453	1.6453	1.61243	1.61243	1.67006	1.67006	1.59457	1.62885	1.62885	1.69425	1.69425
Ca+2	0.0448933	0.0448933	0.0225063	0.0225063	0.0526177	0.0526177	0.0512633	0.0512633	0.0205764	0.0205764	0.0563491	0.078676	0.078676	0.0187435	0.0187435
Na+1	0.00125769	0.00125769	0.001139	0.001139	0.00144166	0.00144166	0.00268991	0.00268991	0.000614901	0.000614901	0.00202842	0.00233513	0.00233513	0.00108107	0.00108107
Cr+3	0.00469895	0.00469895	0.00603806	0.00603806	0.00701263	0.00701263	0.00824081	0.00824081	0.00546069	0.00546069	0.00539752	0.00299671	0.00299671	0.00584117	0.00584117
XM1Fe	0.165959	0.165959	0.161886	0.161886	0.152418	0.152418	0.163061	0.163061	0.158478	0.158478	0.176494	0.13312	0.13312	0.144822	0.144822
XM2Fe	0.161254	0.161254	0.161387	0.161387	0.147571	0.147571	0.159514	0.159514	0.157673	0.157673	0.168893	0.12865	0.12865	0.144542	0.144542
Calculation parameters of the oxybarometer of Ballhaus et al. (1991)
XolFe+2	0.154373	0.148984	0.153653	0.158055	0.132778	0.141534	0.13909	0.138243	0.162331	0.160701	0.162062	0.159857	0.138301	0.126176	0.132844
XspFe+2	0.578554	0.591177	0.597096	0.584356	0.548589	0.522649	0.538432	0.574427	0.567156	0.652284	0.59032	0.637023	0.507232	0.522103	0.546509
XspFe+3	0.130268	0.12412	0.121466	0.1351	0.119129	0.0999986	0.108069	0.117941	0.139415	0.15019	0.124929	0.157422	0.104949	0.105115	0.0889914
XspAl+3	0.236048	0.183206	0.22435	0.211059	0.206607	0.1892	0.189535	0.222749	0.21784	0.192319	0.183358	0.209675	0.248711	0.246129	0.246496
XspCr+3	0.633683	0.692673	0.654184	0.653841	0.674264	0.710801	0.702396	0.65931	0.642745	0.65749	0.691713	0.632903	0.646339	0.648757	0.664513
Calculation parameters of Wood (1990)'s oxybarometer
XolFe+2	0.154373	0.148984	0.153653	0.158055	0.132778	0.141534	0.13909	0.138243	0.162331	0.160701	0.162062	0.159857	0.138301	0.126176	0.132844
XolMg+2	0.845627	0.851016	0.846347	0.841945	0.867222	0.858466	0.86091	0.861757	0.837669	0.839299	0.837938	0.840143	0.861699	0.873824	0.867156
log (activity of Fe3O4 in Spinel)	-1.53754	-1.50302	-1.55795	-1.4668	-1.55752	-1.66183	-1.60958	-1.58194	-1.46306	-1.37748	-1.47855	-1.36107	-1.62955	-1.63612	-1.73977
Calculated P & T
P (GPa)_by the single Cpx barometer	1.94966	2.0021	1.90527	1.74429	1.99702	1.72633	2.08241	1.98478	1.90747	2.10491	1.69678	1.97474	1.83726	1.88477	2.01145
T (°C)_by the single Cpx thermometer	1349.61	1348.8	1340.79	1315.77	1341.16	1323.63	1355.41	1347.69	1335.75	1354.9	1328.08	1334.34	1329.02	1332.73	1341.01
T (°C)_by BBG thermometer	1045.63	1002.45	1002.87	1046.71	1014.41	1076	1042.89	991.342	1101.52	951.972	1027.75	977.064	1036.27	978.773	934.356
Calculated △FMQ values based on the oxybarometer of Ballhaus et al. (1991)
logfO2BBG (T(°C)=the single Cpx thermometer)	-4.83698	-4.85477	-5.02744	-5.22225	-4.80526	-5.55382	-4.93975	-4.79972	-4.9989	-4.5015	-5.31439	-4.65315	-5.31643	-5.04273	-5.2838
△FMQBBG (T(°C)=the single Cpx thermometer)	0.865895	0.826229	0.78235	0.91667	0.949454	0.519619	0.635663	0.901302	0.856917	1.066	0.733311	1.17795	0.642696	0.854394	0.46425
uncertainty-△FMQBBG (T(°C)=the single Cpx thermometer)	0.121683	0.124615	0.157941	0.141505	0.259865	0.29155	0.126658	0.122053	0.108794	0.0999159	0.297162	0.216298	0.229543	0.2465	0.263829
logfO2BBG (T(°C)=BBG thermometer)	-8.25205	-8.8712	-8.9622	-8.32029	-8.58526	-8.35048	-8.46264	-8.97464	-7.5519	-9.3125	-8.78793	-8.89366	-8.66249	-9.26469	-10.2491
△FMQBBG (T(°C)=BBG thermometer)	0.806906	0.738729	0.714206	0.872603	0.857499	0.468012	0.547511	0.808688	0.816973	0.966616	0.685645	1.10224	0.581404	0.761247	0.351284
For comparison-Calculated △FMQ values based on Wood (1990)'s oxybarometer
logfO2Wood (T(°C)=the single Cpx thermometer)	-4.42727	-4.16645	-4.58947	-4.88743	-4.02553	-4.87279	-3.97601	-4.02189	-4.76955	-4.25003	-4.75946	-4.96069	-4.93415	-4.17741	-4.4795
△FMQWood (T(°C)=the single Cpx thermometer)	1.2756	1.51455	1.22031	1.25149	1.72919	1.20065	1.5994	1.67913	1.08627	1.31747	1.28824	0.870414	1.02498	1.71972	1.26855
uncertainty-△FMQWood (T(°C)=the single Cpx thermometer)	0.299	0.376	0.384	0.351	0.412	0.409	0.428	0.398	0.384	0.375	0.426	0.369	0.385	0.434	0.3921
logfO2Wood (T(°C)=BBG thermometer)	-8.0175	-8.37492	-8.7269	-8.15117	-7.98725	-7.8142	-7.66156	-8.40304	-7.45337	-9.2888	-8.41778	-9.41376	-8.45748	-8.61739	-9.69389
△FMQWood (T(°C)=BBG thermometer)	1.04146	1.23501	0.949509	1.04172	1.45552	1.0043	1.3486	1.38029	0.915508	0.99031	1.0558	0.582139	0.786412	1.40854	0.906472

## Sheet: original Sp & Ol EMPA data
Location	Sample Type.	Spinel EMPA data	SiO2	TiO2	Al2O3	Cr2O3	FeOt	MnO	MgO	NiO	Total		Paired Olivine EMPA data	SiO2	TiO2	Al2O3	FeOt	MnO	MgO	NiO	CaO	Cr2O3	Total
Sailipu	Lherzolite Xenolith	P15-2-1-1-SPL1	0.305	3.909	10.721	42.903	31.178	0.234	9.333	0.053	99.932		P15-2-1-1-OL1	39.265	-	0.037	14.582	0.074	44.808	0.135	0.039	0.097	99.11
Sailipu	Lherzolite Xenolith	P15-2-1-1-SPL2	0.05	2.494	8.571	48.306	30.234	0.189	8.554	0.084	100.052		P15-2-1-1-OL2	39.693	-	-	13.971	0.122	44.767	0.164	0.049	0.087	98.998
		error(±)	0.180312	1.00056	1.52028	3.8205	0.667509	0.0318198	0.550836	0.0219203			error(±)	0.302642	-	0.026163	0.432042	0.0339411	0.0289914	0.0205061	0.00707107	0.00707107
Sailipu	Lherzolite Xenolith	P15-2-1-1-SPL3	0.092	3.525	10.261	44.601	30.832	0.193	8.707	0.072	99.615		P15-2-1-1-OL3	39.652	0.09	-	14.499	0.139	44.8	0.118	0.063	0.068	99.443
Sailipu	Lherzolite Xenolith	P15-2-1-1-SPL4	0.124	3.258	9.648	44.554	30.964	0.246	8.882	0.026	99.382		P15-2-1-1-OL4	39.684	-	0.022	14.986	0.155	44.781	0.165	0.079	0.046	99.981
		error(±)	0.0226274	0.188798	0.433456	0.033234	0.0933381	0.0374767	0.123744	0.0325269			error(±)	0.0226274	0.0636396	0.0155563	0.344361	0.0113137	0.013435	0.033234	0.0113137	0.0155563
Sailipu	Lherzolite Xenolith	P15-2-1-1-SPL5	0.039	2.838	9.691	47.145	28.731	0.145	9.627	0.089	100.086		P15-2-1-1-OL5	39.908	0.079	0.003	12.577	0.081	46.08	0.17	0.079	0.054	99.084
Sailipu	Lherzolite Xenolith	P15-2-1-1-SPL6	0.052	2.118	9.056	50.716	26.293	0.236	10.015	0.023	100.083		P15-2-1-1-OL6	40.058	0.011	0.027	13.594	0.145	46.253	0.177	0.099	0.052	100.5
		error(±)	0.00919239	0.509117	0.449013	2.52508	1.72393	0.0643467	0.274357	0.046669			error(±)	0.106066	0.0480833	0.0169706	0.719128	0.0452548	0.122329	0.00494975	0.0141421	0.00141421
Sailipu	Lherzolite Xenolith	P15-2-1-1-SPL7	0.087	2.007	8.969	49.547	27.081	0.228	9.557	0.022	99.335		P15-2-1-1-OL7	40.419	0.022	0.009	13.268	0.094	46.068	0.147	0.056	0.035	100.16
Sailipu	Lherzolite Xenolith	P15-2-1-1-SPL8	0.069	3.417	10.342	45.631	29.996	0.167	9.259	0.077	100.459		P15-2-1-1-OL8	40.299	-	-	13.047	0.124	45.623	0.17	0.062	0.074	99.421
		error(±)	0.0127279	0.997021	0.970858	2.76903	2.06122	0.0431335	0.210718	0.0388909			error(±)	0.0848528	0.0155563	0.00636396	0.156271	0.0212132	0.314663	0.0162635	0.00424264	0.0275772
Sailipu	Lherzolite Xenolith	P15-2-1-1-SPL10	0.063	3.55	10.041	44.163	31.013	0.254	9.4	0.047	99.812		P15-2-1-1-OL10	39.701	-	0.021	15.135	0.091	43.811	0.171	0.093	0.086	99.252
Sailipu	Lherzolite Xenolith	P15-2-1-1-SPL11	0.066	3.102	8.699	44.332	33.899	0.227	7.274	0.092	99.495		P15-2-1-1-OL11	39.597	-	0.017	15.16	0.064	44.415	0.195	0.085	0.131	99.766
		error(±)	0.00212132	0.316784	0.948937	0.119501	2.04071	0.0190919	1.50331	0.0318198			error(±)	0.0735391	-	0.00282843	0.0176777	0.0190919	0.427092	0.0169706	0.00565685	0.0318198
Sailipu	Lherzolite Xenolith	P15-2-1-1-SPL14	0.079	2.061	8.558	48.126	29.761	0.219	8.387	0.071	99.148		P15-2-1-1-OL14	40.486	-	-	15.296	0.131	44.365	0.164	0.061	0.039	100.587
Sailipu	Lherzolite Xenolith	P15-2-1-1-SPL15	0.126	3.564	9.436	42.458	34.268	0.203	7.762	0.101	99.713		P15-2-1-1-OL15	39.82	-	0.001	14.837	0.265	43.742	0.055	0.166	0.057	98.989
		error(±)	0.033234	1.06278	0.62084	4.00788	3.18693	0.0113137	0.441942	0.0212132			error(±)	0.470933	-	0.000707107	0.324562	0.0947523	0.440528	0.0770746	0.0742462	0.0127279
Sailipu	Lherzolite Xenolith	P15-2-1-1-SPL16	0.118	1.667	11.759	45.553	25.429	0.147	10.047	0.105	96.498		P15-2-1-1-OL16	40.408	0.011	0.187	12.809	0.101	44.769	0.195	0.128	0.168	99.014
Sailipu	Lherzolite Xenolith	P15-2-1-1-SPL17	0.025	2.155	11.959	46.989	26.946	0.235	10.14	0.116	99.879		P15-2-1-1-OL17	40.438	0.089	0.565	11.441	0.114	44.447	0.202	0.132	1.644	99.169
Sailipu	Lherzolite Xenolith	P15-2-1-1-SPL19	0.198	1.422	11.983	48.155	26.291	0.188	9.4	0.151	99.16		P15-2-1-1-OL19	41.517	-	0.222	12.236	0.211	44.805	0.211	0.204	0.157	99.627
		error(±)	0.0865814	0.373153	0.122985	1.30333	0.76085	0.0440341	0.403084	0.0240208	1.78112		error(±)	0.631799	0.0485215	0.208869	0.686996	0.0601082	0.197123	0.00802081	0.0427707	0.855362
